# Supplementary material for: Identifying predictors of response to oral non-steroidal anti-inflammatory drugs and paracetamol in osteoarthritis: a hypothesis-driven protocol for an OA Trial Bank individual participant data meta-analysis
Source: HighWire-hosted journal article supplement (doi:10.1136/bmjopen-2021-048652), 2021-08-01
Supplement: bmjopen-2021-048652supp002_data_supplement.pdf [file bmjopen-2021-048652supp002_data_supplement.pdf]

## Appendix 2. Modified Cochrane Risk of Bias tool<sup>34</sup>

| Source of bias                                        | Criteria for a judgment of “yes”                                                                                                                                                                                                                                                                                                                                                                                                                                                                                                                                              | Criteria for a judgment of “no”                                                                                                                                                                                                                                                                                                                                                                                                                                                                                                                                                                                                                             |
|-------------------------------------------------------|-------------------------------------------------------------------------------------------------------------------------------------------------------------------------------------------------------------------------------------------------------------------------------------------------------------------------------------------------------------------------------------------------------------------------------------------------------------------------------------------------------------------------------------------------------------------------------|-------------------------------------------------------------------------------------------------------------------------------------------------------------------------------------------------------------------------------------------------------------------------------------------------------------------------------------------------------------------------------------------------------------------------------------------------------------------------------------------------------------------------------------------------------------------------------------------------------------------------------------------------------------|
| 1. Was the randomisation procedure adequate?          | <p><b>YES</b> – A random component in the sequence generation process is used, such as:</p> <ul style="list-style-type: none"> <li>• Using a random number table</li> <li>• Using a computer random number generator</li> <li>• Tossing a coin</li> <li>• Shuffling cards or envelopes</li> <li>• Throwing dice</li> <li>• Drawing lots</li> <li>• Minimisation</li> <li>• Randomisation generated by outside statistician/central group</li> <li>• Random permuted block scheme</li> </ul>                                                                                   | <p><b>NO</b> – a non-random component is used in the allocation process, such as:</p> <ul style="list-style-type: none"> <li>• Sequence generated using odd or even date of birth</li> <li>• Sequence based on a rule based on date of admission or hospital number</li> <li>• Allocation decision is made by clinician or participant</li> <li>• Allocation is based on clinical or laboratory test findings</li> </ul> <p><b>Unclear</b> – Study uses statements such as “we randomly allocated” or “using a randomised design”, but insufficient detail is given of the process to allow a decision to be made regarding the adequacy of the method.</p> |
| 2. Was the treatment allocation adequately concealed? | <p><b>YES</b> – participants and physicians could not foresee allocation assignment, because an adequate method was used to conceal allocation. Adequate allocation concealment methods include:</p> <ul style="list-style-type: none"> <li>• Central allocation</li> <li>• Identical drug containers are sequentially numbered</li> <li>• Opaque, sealed, sequentially numbered assignment envelopes are used</li> <li>• Remotely labelled study kit with no indication of treatment within</li> <li>• Statement that allocation was concealed from investigators</li> </ul> | <p><b>NO</b> – participants or physicians could potentially foresee allocation. Inadequate allocation concealment procedures include:</p> <ul style="list-style-type: none"> <li>• The use of an open random allocation schedule</li> <li>• Assignment envelopes are not appropriate, such that envelopes may be unsealed, not sequentially numbered, or see-through</li> <li>• Rotation or alternation</li> <li>• Methods based on date of birth, case record number, or other patient identifiers</li> </ul> <p><b>Unclear</b> – No mention of precautions taken to conceal treatment allocation.</p>                                                     |
| 3. Were participants blinded to the intervention?     | <p><b>YES</b> – patients were adequately blinded and it is unlikely that the blinding could be broken. A statement describing that the treatments were identical or “matched” is expected to allow a decision.</p>                                                                                                                                                                                                                                                                                                                                                            | <p><b>NO</b> – No blinding, incomplete blinding, or blinding attempted but likely to have been broken</p> <p><b>Unclear</b> – Study reported as single- or double-blinded but no description of the process of blinding, thereby not allowing a decision to be made regarding the adequacy.</p>                                                                                                                                                                                                                                                                                                                                                             |
| 4. Were physicians blinded to the intervention?       | <p><b>YES</b> – physicians were adequately blinded and it is unlikely that the blinding could be broken. If the</p>                                                                                                                                                                                                                                                                                                                                                                                                                                                           | <p><b>NO</b> – No blinding, incomplete blinding, or blinding attempted but likely to have been broken</p>                                                                                                                                                                                                                                                                                                                                                                                                                                                                                                                                                   |

|                                                                                  |                                                                                                                                                                                                                                                                                                                                                                                                                                  |                                                                                                                                                                                                                                                                                                                                                                                                                                                                                               |
|----------------------------------------------------------------------------------|----------------------------------------------------------------------------------------------------------------------------------------------------------------------------------------------------------------------------------------------------------------------------------------------------------------------------------------------------------------------------------------------------------------------------------|-----------------------------------------------------------------------------------------------------------------------------------------------------------------------------------------------------------------------------------------------------------------------------------------------------------------------------------------------------------------------------------------------------------------------------------------------------------------------------------------------|
|                                                                                  | <i>treatments are identical a statement that the physicians were blinded allows a yes</i>                                                                                                                                                                                                                                                                                                                                        |                                                                                                                                                                                                                                                                                                                                                                                                                                                                                               |
|                                                                                  | <b>Unclear</b> – Study reported as single- or double-blinded but no description of the process of blinding, thereby not allowing a decision to be made regarding the adequacy.                                                                                                                                                                                                                                                   |                                                                                                                                                                                                                                                                                                                                                                                                                                                                                               |
| 5. Were outcome assessors blinded to the intervention?                           | <b>YES</b> – treatment choice is not evident when measuring outcome. <ul style="list-style-type: none"> <li>If outcome is patient-reported, then the answer for “Were participants blinded to the intervention?” will be the same for this question.</li> <li>For physician-assessed outcomes, this is dependent on whether the treatment allocation can be identified from examination of the patient or their tests</li> </ul> | <b>NO</b> – treatment choice is likely to be evident when measuring outcome <ul style="list-style-type: none"> <li>If outcome is patient-reported, then the answer for “Were participants blinded to the intervention?” will be the same for this question.</li> <li>For physician-assessed outcomes, this is dependent on whether the treatment allocation can be identified from examination of the patient or their tests</li> </ul>                                                       |
| 6. Incomplete outcome data: Is the attrition rate <15%?                          | <b>YES</b> – drop-out rate is less than 15%                                                                                                                                                                                                                                                                                                                                                                                      | <b>NO</b> – drop-out rate is greater than 15%                                                                                                                                                                                                                                                                                                                                                                                                                                                 |
|                                                                                  | <b>Unclear</b> – flow of patients not given. Unable to ascertain number of withdrawals                                                                                                                                                                                                                                                                                                                                           |                                                                                                                                                                                                                                                                                                                                                                                                                                                                                               |
| 7. Are all pre-specified outcomes of interest reported in the pre-specified way? | <b>YES</b> – all the study’s pre-specified outcomes of interest are reported in the pre-specified way                                                                                                                                                                                                                                                                                                                            | <b>NO</b> – Outcome measures were not pre-specified, such as: <ul style="list-style-type: none"> <li>Not all the pre-specified outcomes have been reported</li> <li>Outcomes are not reported using the measurements or methods pre-specified</li> <li>Outcomes reported had not been pre-specified, such as post-hoc analyses</li> <li>Outcomes of interest have been incompletely reported</li> <li>The report does not report outcomes that would be expected from such a study</li> </ul> |
| 8. Was intention-to-treat analysis used?                                         | <b>YES</b> – all randomised participants are analysed according to the group they were allocated to, regardless of non-compliance, protocol violations, drop-outs etc.                                                                                                                                                                                                                                                           | <b>NO</b> – the study states that ITT was used, but patients have been excluded from analysis, post-randomisation, for variety of reasons. Alternatively, per-protocol analysis is used to analyse only participants that adhered fully to their allocated treatment, excluding any drop-outs or moves between treatment groups.                                                                                                                                                              |
|                                                                                  | <b>Unclear</b> – does not mention if ITT or PP used and n for each outcome not presented                                                                                                                                                                                                                                                                                                                                         |                                                                                                                                                                                                                                                                                                                                                                                                                                                                                               |
| 9. Were the treatment and control group similar at baseline?                     | <b>YES</b> – treatment and control group were similar regarding patient demographics and baseline parameters.                                                                                                                                                                                                                                                                                                                    | <b>NO</b> – Treatment and control groups were dissimilar with regards to patient demographics and baseline parameters. Alternatively, characteristics are not presented in either text or table                                                                                                                                                                                                                                                                                               |

---

***Unclear***- if characteristics are mentioned in text, but data are not presented

---

34. Higgins J, Green S. Cochrane Handbook for Systematic Reviews of Interventions Version 5.1.0. *The Cochrane Collaboration* 2011.
